# Supplementary material for: Preparation of 3-aceta mido-5-acetylfuran from N-acetylglucosamine and chitin using biobased deep eutectic solvents as catalysts
Source: Royal Society of Chemistry journal article supplement (doi:10.1039/d2re00118g), 2022-01-01
Supplement: d2re00118g1.pdf [file d2re00118g1.pdf]

Supporting information for

**Preparation of N-containing chemical 3-acetamido-5-acetylfuran from N-acetylglucosamine and chitin using green deep eutectic solvent as the catalyst**

Chaoqiang Wu<sup>a</sup>, Chengyong Wang<sup>a</sup>, Alei Zhang<sup>a,b,\*</sup>, Kequan Chen<sup>a,\*</sup>, Fei Cao<sup>a</sup>,  
Pingkai Ouyang<sup>a</sup>

*<sup>a</sup>State Key Laboratory of Materials-Oriented Chemical Engineering, College of Biotechnology and Pharmaceutical Engineering, Nanjing Tech University, Nanjing 211816, China.*

*<sup>b</sup>Jiangsu Key Laboratory of Marine Bioresources and Environment, Jiangsu Ocean University, Lianyungang, 222005, China.*

\*Corresponding author: Alei Zhang, Kequan Chen

E-mail address: [zhangalei@njtech.edu.cn](mailto:zhangalei@njtech.edu.cn); [kqchen@njtech.edu.cn](mailto:kqchen@njtech.edu.cn)

Table S1 Dissociation constant of HBDs in this article in aqueous solution (25 °C).

| DES  | Hydrogen bond donor <sup>a</sup> | pKa                |
|------|----------------------------------|--------------------|
| CCCA | Citric acid monohydrate          | 3.13 <sup>a</sup>  |
|      |                                  | 4.76 <sup>b</sup>  |
|      |                                  | 6.40 <sup>c</sup>  |
| CCMA | Malonic acid                     | 2.85 <sup>a</sup>  |
|      |                                  | 5.66 <sup>b</sup>  |
| CCML | D/L-malic acid                   | 2.85 <sup>a</sup>  |
|      |                                  | 4.76 <sup>b</sup>  |
| CCSA | Succinic acid                    | 4.20 <sup>a</sup>  |
|      |                                  | 5.63 <sup>b</sup>  |
| CCLA | Lactic acid                      | 3.86 <sup>a</sup>  |
| CCUR | Urea                             | 13.82 <sup>a</sup> |

<sup>a</sup> Primary dissociation constants, <sup>b</sup> Secondary dissociation constants, <sup>c</sup> Tertiary dissociation constant

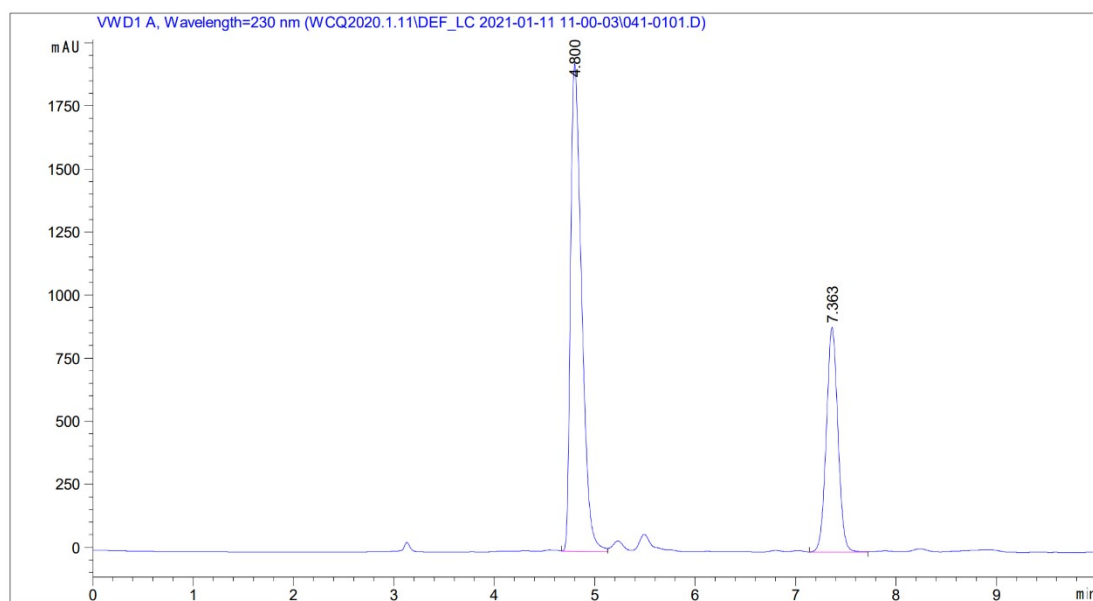

Fig. S1. HPLC spectra of the reaction mixture of 3A5AF

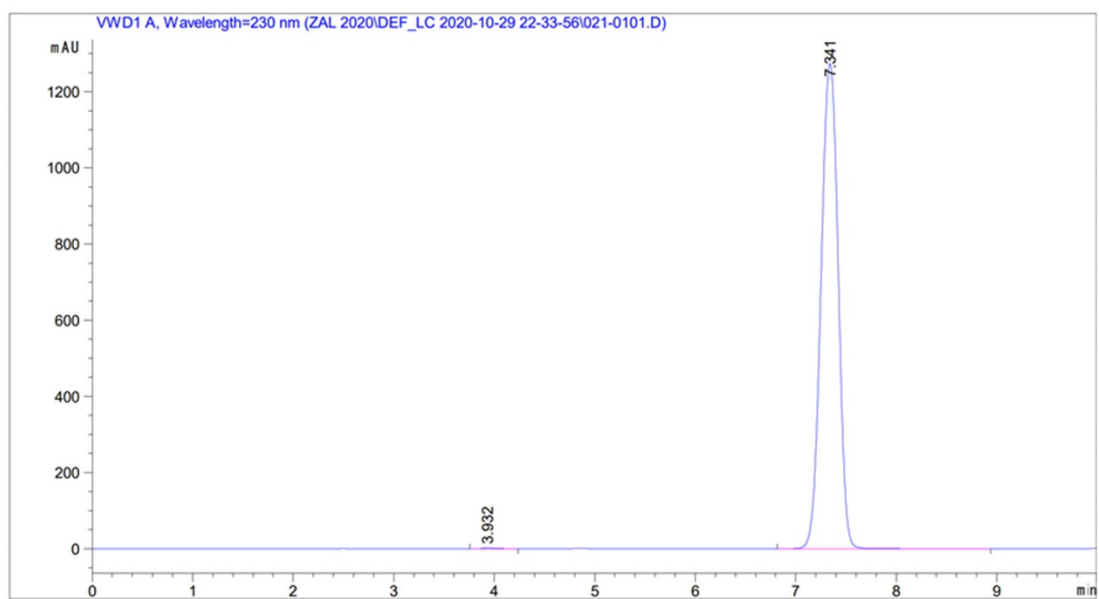

Fig. S2. HPLC spectra of purified 3A5AF.

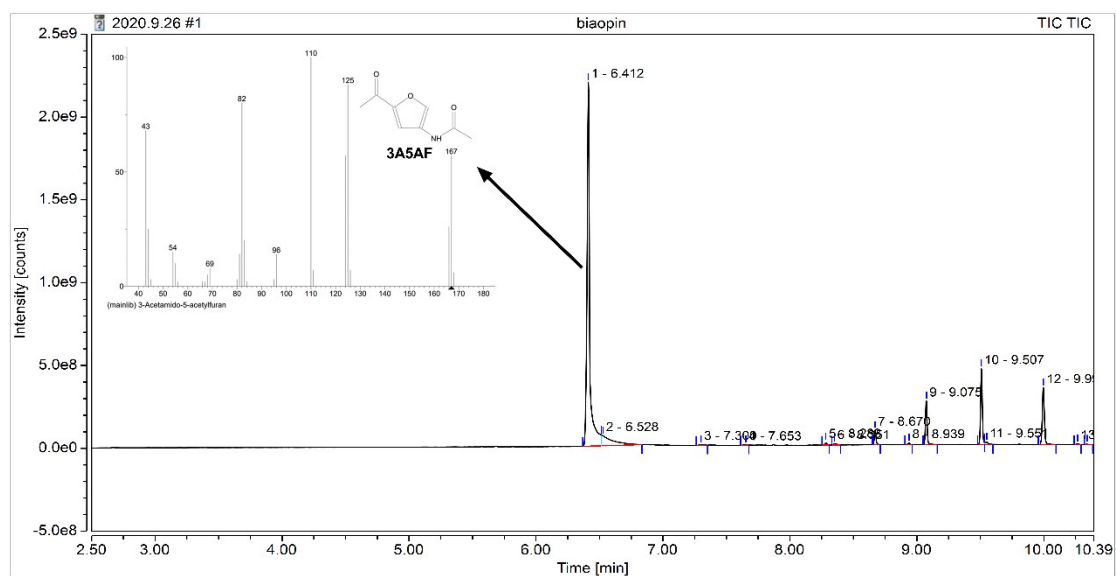

Fig. S3. The GC-MS analysis of production in Methanol.

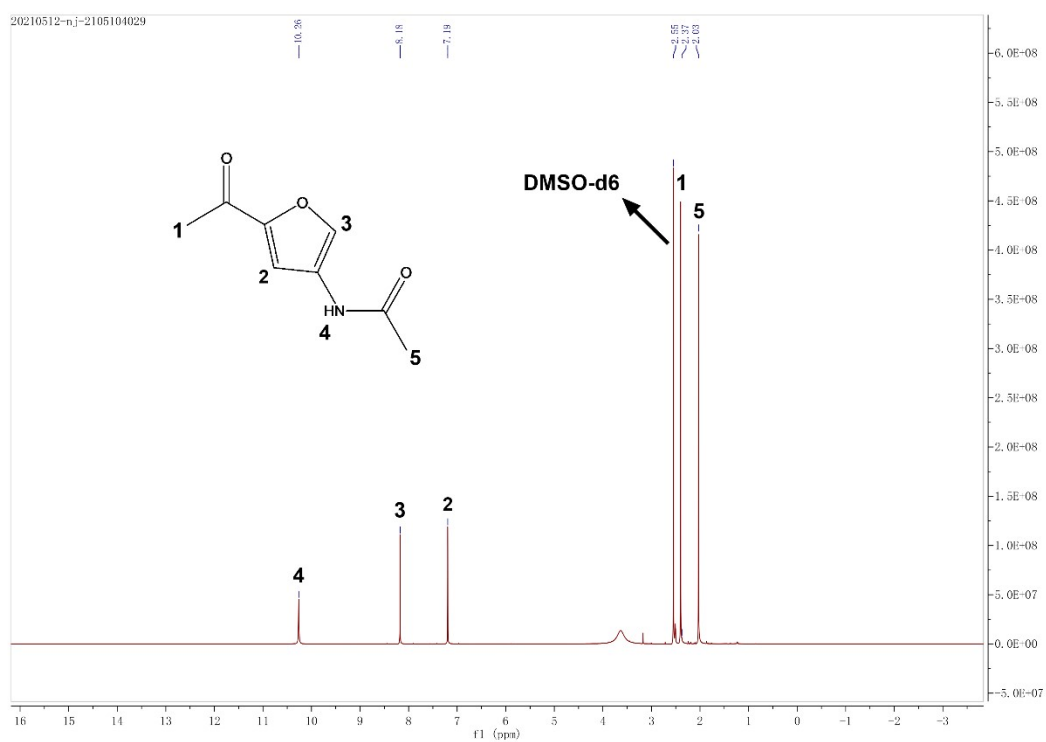

Fig. S4.  $^1\text{H}$ -NMR spectra of isolated product 3A5AF in DMSO-d<sub>6</sub>.

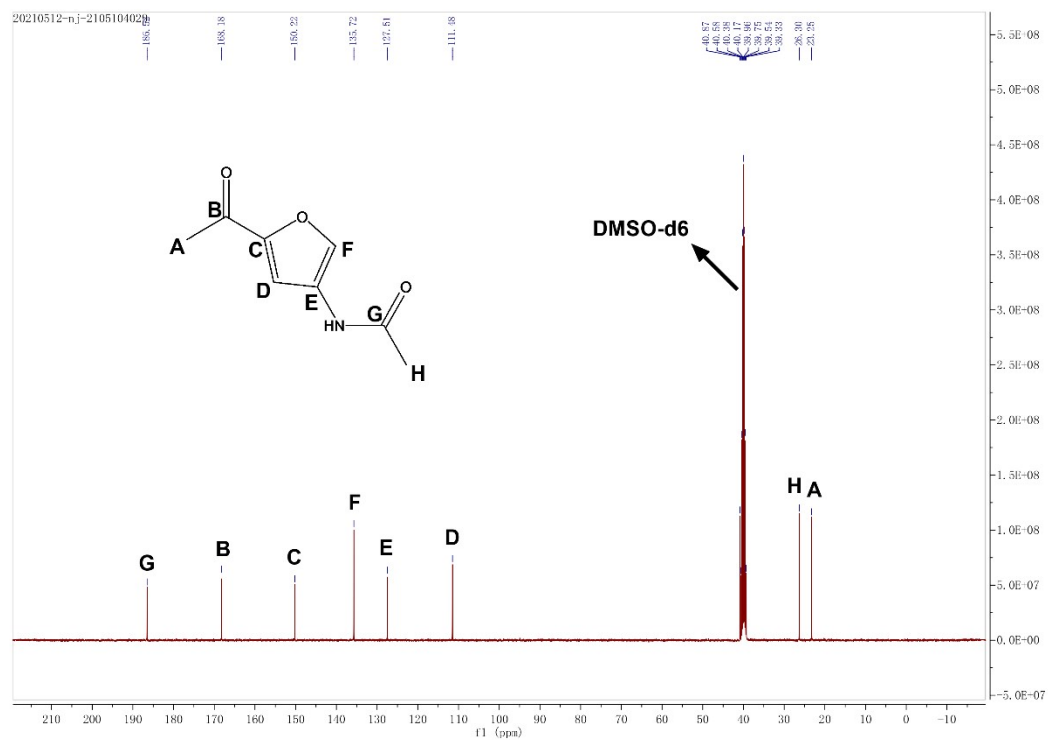

Fig. S5.  $^{13}\text{C}$ -NMR spectra of isolated product 3A5AF in DMSO-d<sub>6</sub>.
